# Supplementary material for: Barriers to optimal care and strategies to promote safe and optimal management of sick young infants during the COVID-19 pandemic: A multi-country formative research study
Source: PubMed Central journal article supplement (PMC9440476; doi:10.7189/jogh.12.05023), 2022-09-03
Supplement: jogh-12-05023-s001.pdf [file jogh-12-05023-s001.pdf]

**Supplementary Figure S1. Conceptual framework of possible factors influencing PSBI management due to the COVID-19 pandemic**

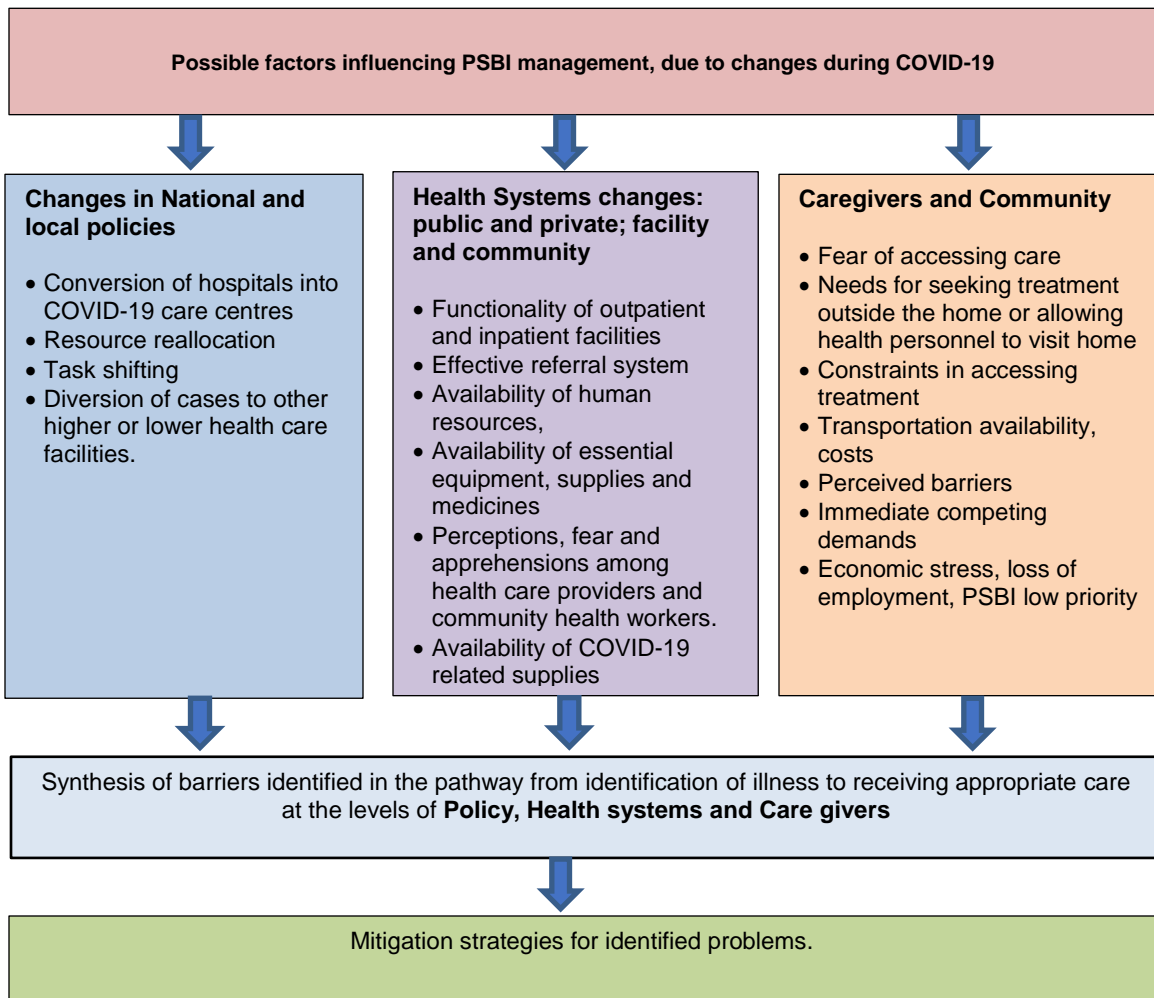

**Supplementary Table S1. Site description**

| Site                                              | Bangladesh                                                                    | Ethiopia                                                           | UP, India                                                                         | HP, India                                                    | Nigeria                                                                                                                     | Pakistan                                                                     |
|---------------------------------------------------|-------------------------------------------------------------------------------|--------------------------------------------------------------------|-----------------------------------------------------------------------------------|--------------------------------------------------------------|-----------------------------------------------------------------------------------------------------------------------------|------------------------------------------------------------------------------|
| Study area in square kilometers                   | 3452                                                                          | 625*                                                               | 1100                                                                              | 2825                                                         | 2629                                                                                                                        | 2590                                                                         |
| Population                                        | ~ 3,434,188                                                                   | ~ 1,270,472                                                        | ~ 1,900,000                                                                       | ~ 579,942                                                    | ~ 550,000                                                                                                                   | ~ 4,980,527                                                                  |
| Population type                                   | Urban, rural                                                                  | Urban, rural                                                       | Urban and rural                                                                   | Peri-Urban                                                   | Peri-urban, Rural                                                                                                           | Urban, rural                                                                 |
| Number of study facilities                        | 4                                                                             | 2                                                                  | 3                                                                                 | 2                                                            | 3                                                                                                                           | 2                                                                            |
| Level of study facilities                         | Two secondary level hospitals and two tertiary level hospitals                | Two secondary level hospitals                                      | One tertiary level and two secondary-level hospitals                              | One tertiary level and one secondary-level hospital          | Three secondary level hospitals                                                                                             | One tertiary level and one secondary-level hospital                          |
| Number of total beds in study facilities          | Secondary level hospitals: 50   Tertiary level hospitals: 500-1000            | Secondary level hospital: 301   Tertiary hospital: 346             | Secondary level hospitals: 50 – 100 beds/hospital   Tertiary level hospital: 1000 | Tertiary level hospital: 250   Secondary level hospital: 100 | Giwa General Hospital: 175   Hajiya Gambo Sawaba General Hospital: 200   Major Ibrahim Bello Abdullahi General Hospital: 75 | Secondary level hospital: 122   Tertiary level hospital: 81                  |
| Number of paediatric beds in study facilities     | Secondary level hospitals: not specified   Tertiary level hospital: 80        | Secondary level hospitals: 83   Tertiary level hospitals: 116 beds | Secondary level hospitals: 19   Tertiary level hospital: 120                      | Tertiary level hospital: 35   Secondary level hospital: 21   | Giwa General Hospital: 80   Hajiya Gambo Sawaba General Hospital: 25   Major Ibrahim Bello Abdullahi General Hospital: 0    | Secondary level hospital: 110   Tertiary level hospital: 0                   |
| Neonatal intensive care units in study facilities | Secondary level hospitals: not available   Tertiary level hospital: available | Available in all hospitals                                         | Available in all hospitals                                                        | Available in all hospitals                                   | Not available at all hospitals                                                                                              | Secondary level hospital: not available   Tertiary level hospital: available |

\* Only main towns were included to estimate the study area, rural catchment areas were not included
